# Supplementary material
Source: publisher figshare collection journal article supplement (https://geolsoc.figshare.com/articles/dataset/_/3453662)

WNW

ESE

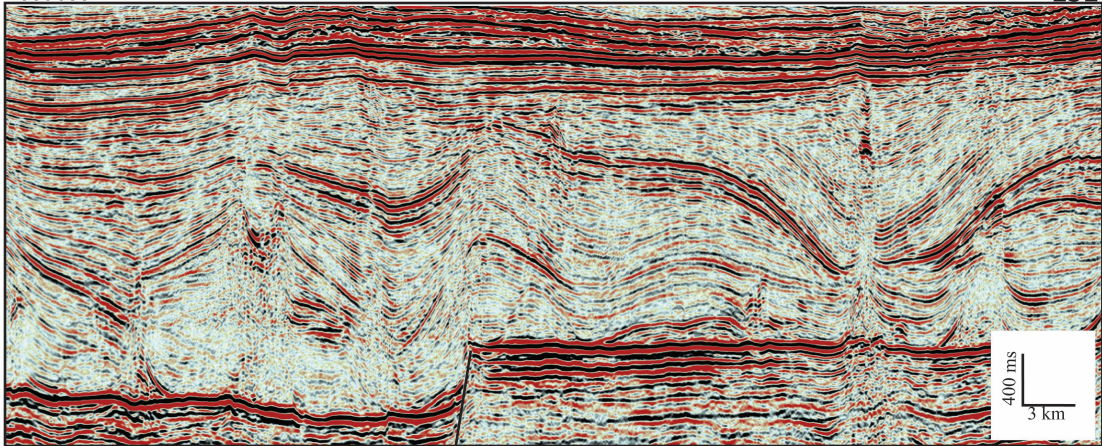

Supplement: Supplementary file 1 [file 1]

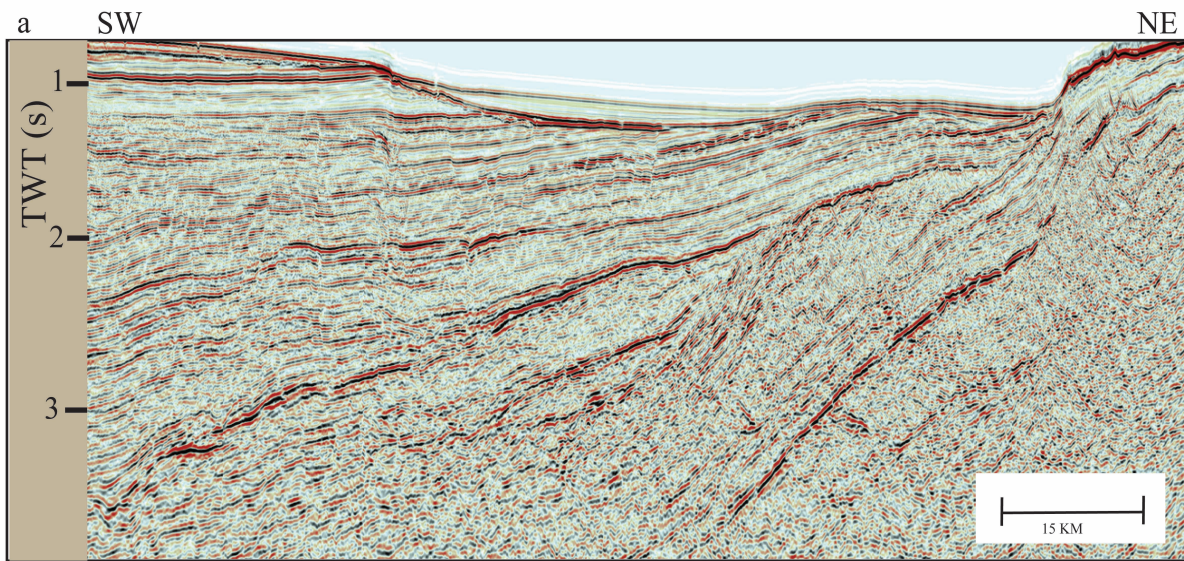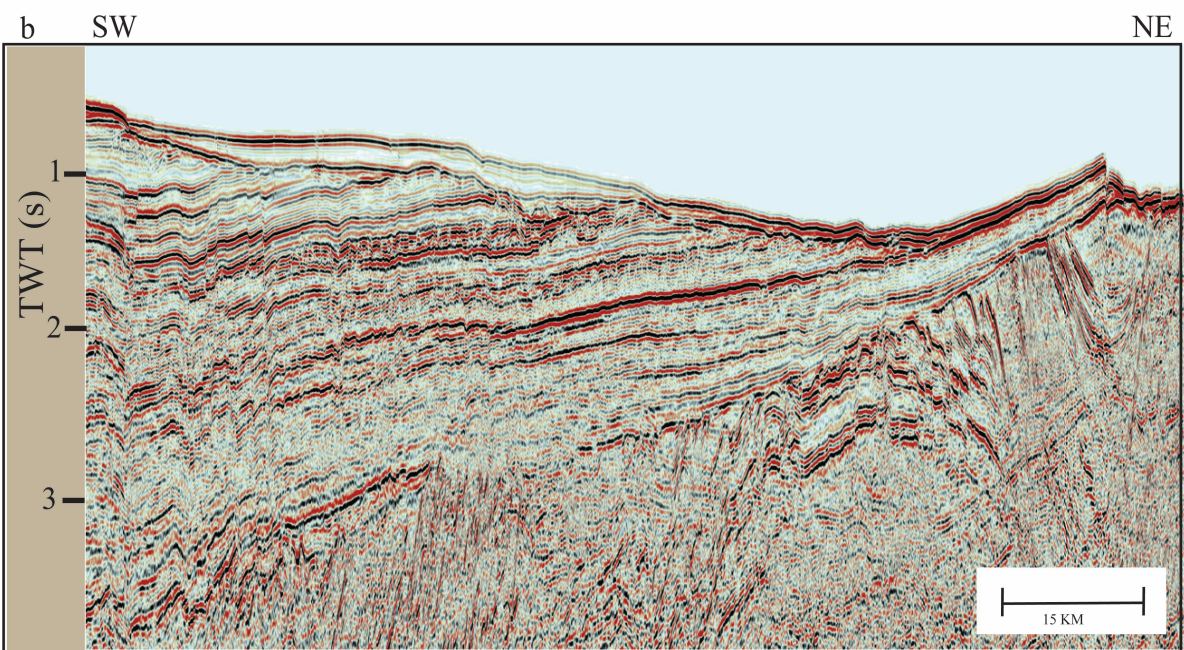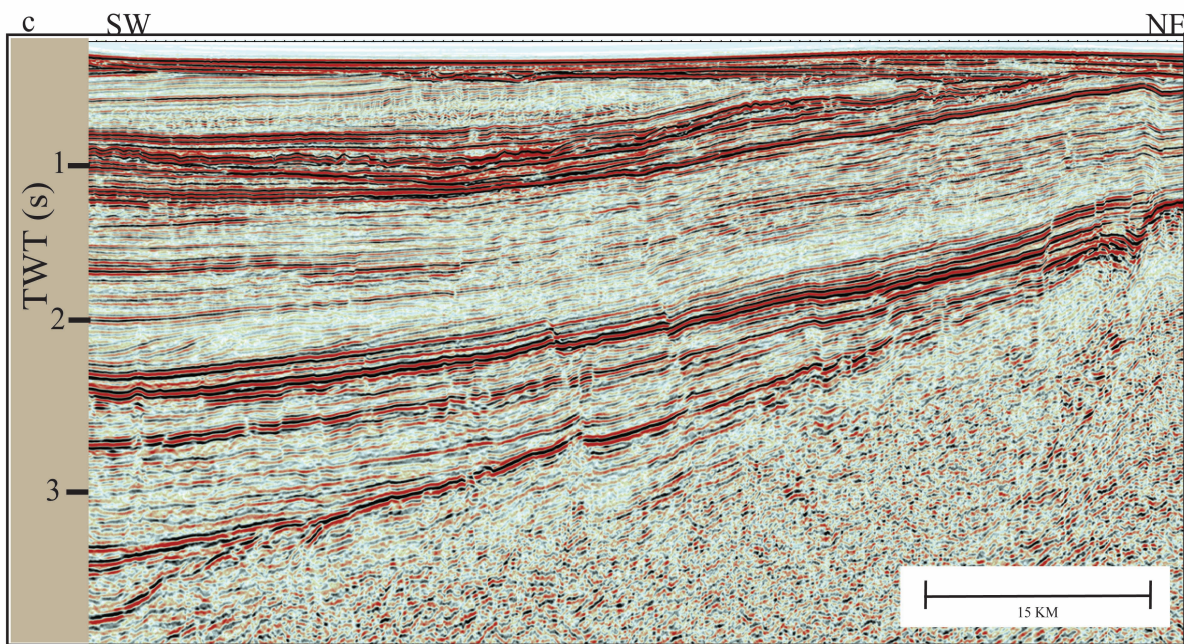

Supplement: Supplementary file 2 [file 1]

A

A'

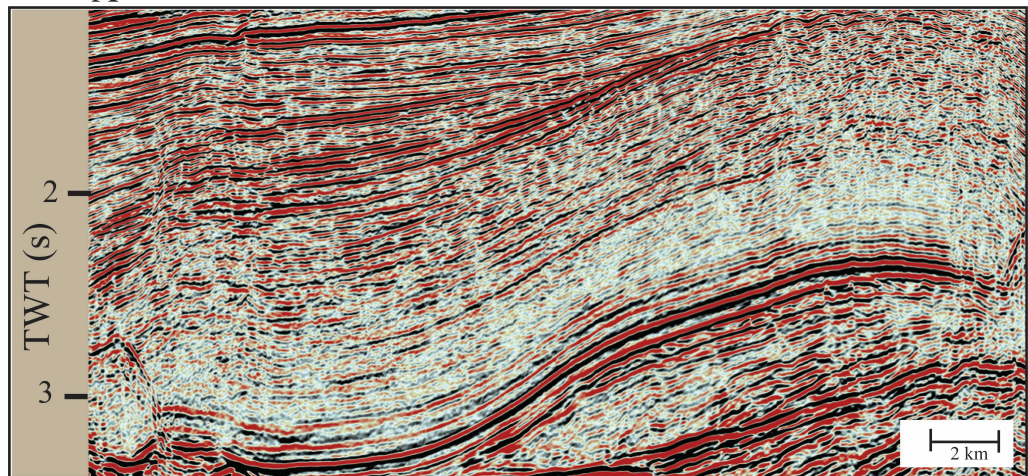

B

B'

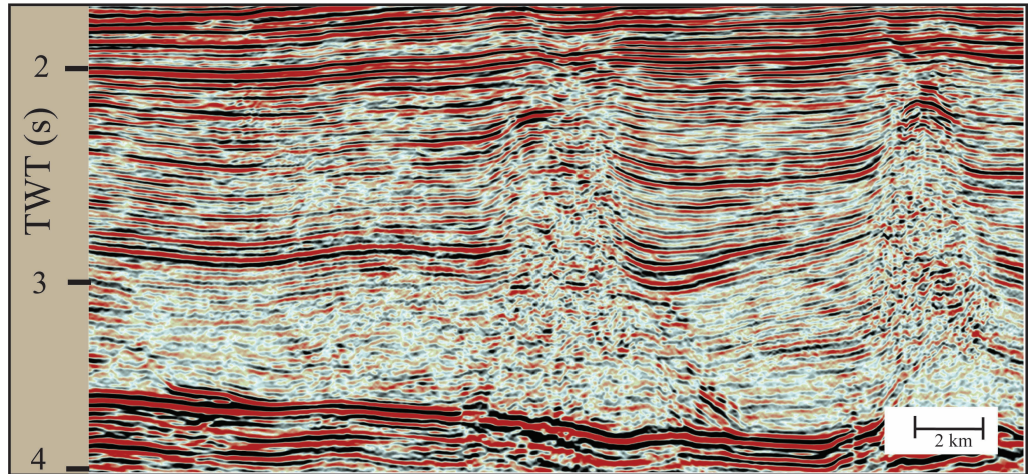

C

C'

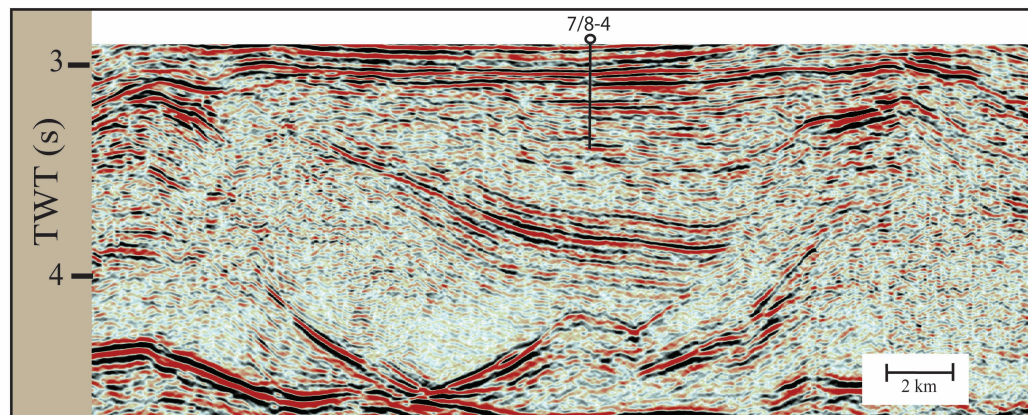

Supplement: Supplementary file 3 [file 1]

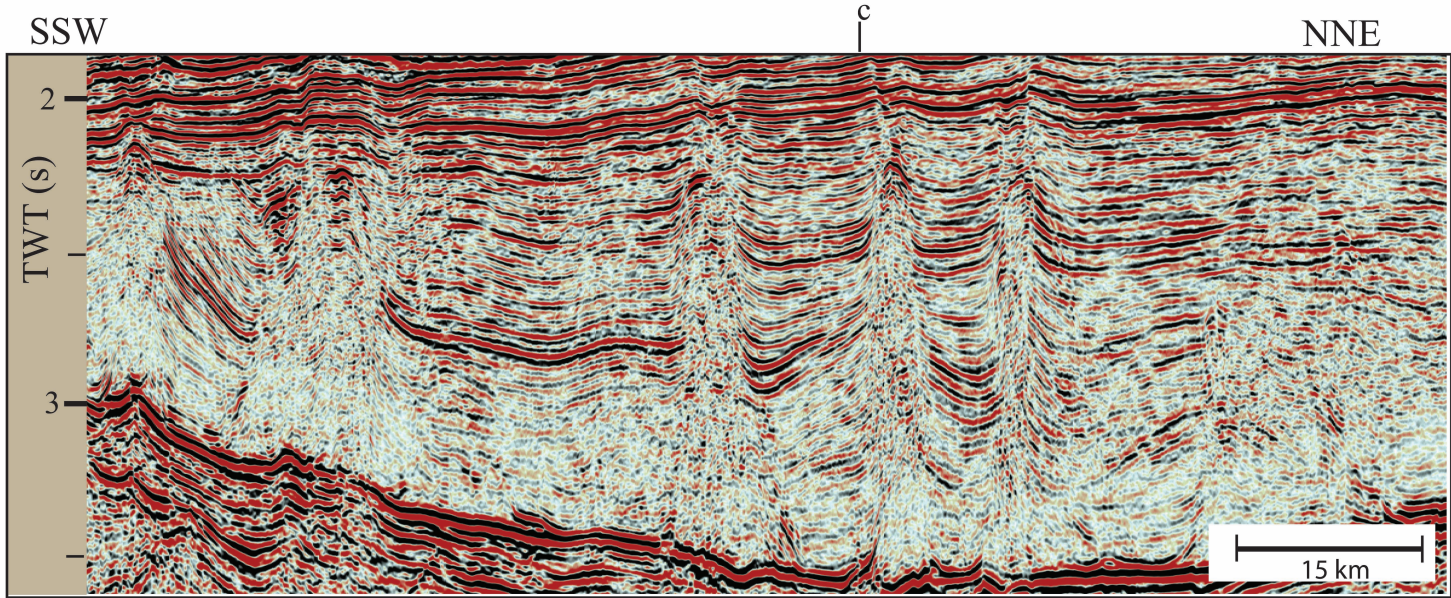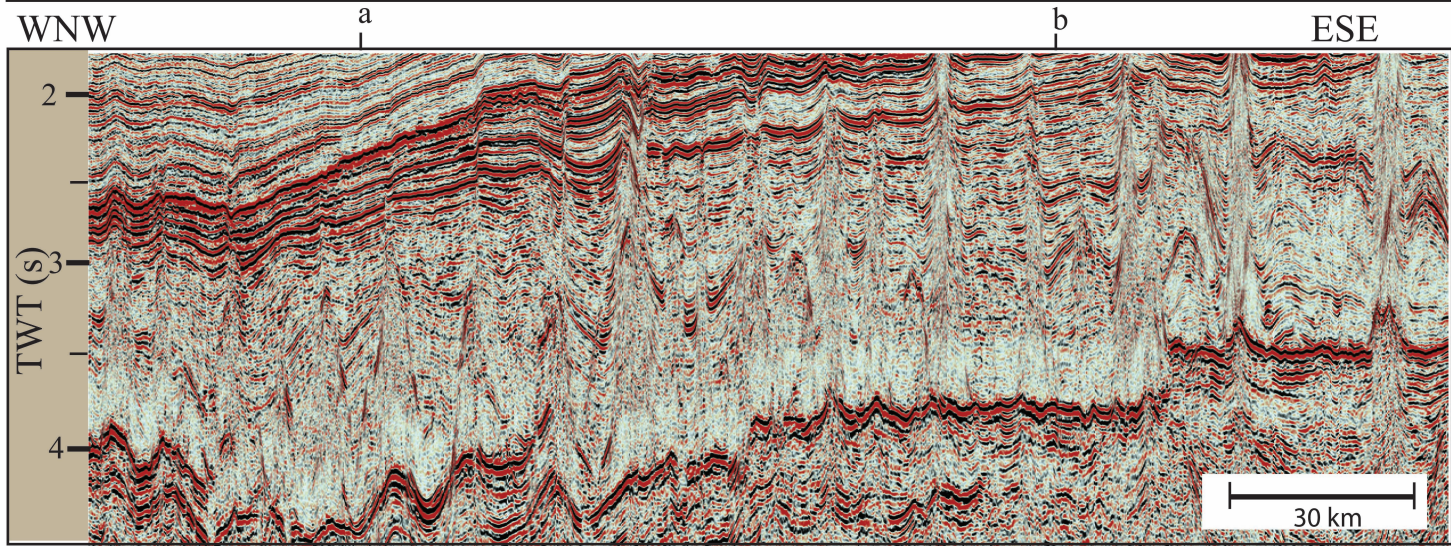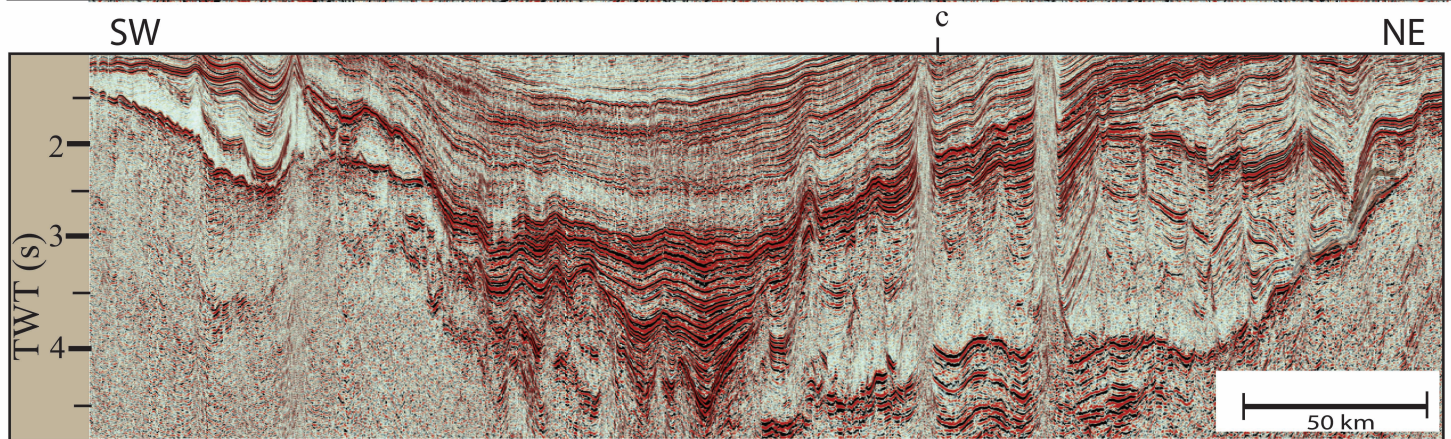

Mid North Sea High

Central Graben

Norwegian-Danish Basin

Stavanger Platform

Supplement: Supplementary file 4 [file 1]
